# Supplementary figures and images for: Deep Vertebrate Roots for Mammalian Zinc Finger Transcription Factor Subfamilies
Source: PubMed Central journal article supplement — Genome Biol Evol. 2014 Feb 17;6(3):510–25. doi: 10.1093/gbe/evu030 (PMC3971581; doi:10.1093/gbe/evu030), 2014-02-17

Figure S2. Expression patterns for primate-specific human genes. See Figure 5 in text for details.

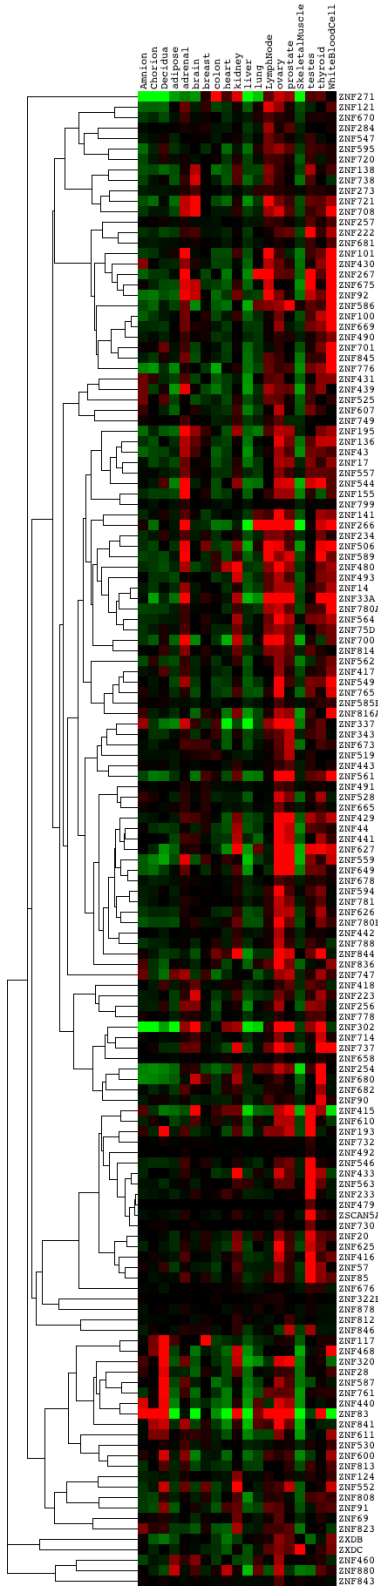

Supplement: supp_evu030_Figure_S2.pdf [file supp_evu030_Figure_S2.pdf]
